# Supplementary material
Source: MDPI journal article supplement (https://www.mdpi.com/2227-9717/11/12/3403)
Supplement: s1 [file s1 › processes-2758671-supplementary.pdf]

## Supplementary Material

# Use of Simulated Sunlight Radiation and Hydrogen Peroxide to Remove Xenobiotics from Aqueous Solutions

Bruna Babić Visković <sup>1,\*</sup>, Anamaria Maslač <sup>1</sup>, Davor Dolar <sup>2</sup> and Danijela Ašperger <sup>1,\*</sup>

<sup>1</sup> Department of Analytical Chemistry, University of Zagreb Faculty of Chemical Engineering and Technology, Marulićev trg 19, 10000 Zagreb, Croatia; amaslac@fkit.unizg.hr

<sup>2</sup> Department of Physical Chemistry, University of Zagreb Faculty of Chemical Engineering and Technology, Marulićev trg 19, 10000 Zagreb, Croatia; dolar@fkit.unizg.hr

\* Correspondence: bbabic@fkit.unizg.hr (B.B.V.); diva@fkit.unizg.hr (D.A.); Tel.: +385-1-4597-207 (B.B.V.); +385-1-4597-212 (D.A.)

Table S1. Sampling times when performing photolysis

| <i>t</i> , min | 0 | 5 | 10 | 15 | 20 | 30 | 60 | 90 | 120 | 180 | 240 | 300 |
|----------------|---|---|----|----|----|----|----|----|-----|-----|-----|-----|
|----------------|---|---|----|----|----|----|----|----|-----|-----|-----|-----|

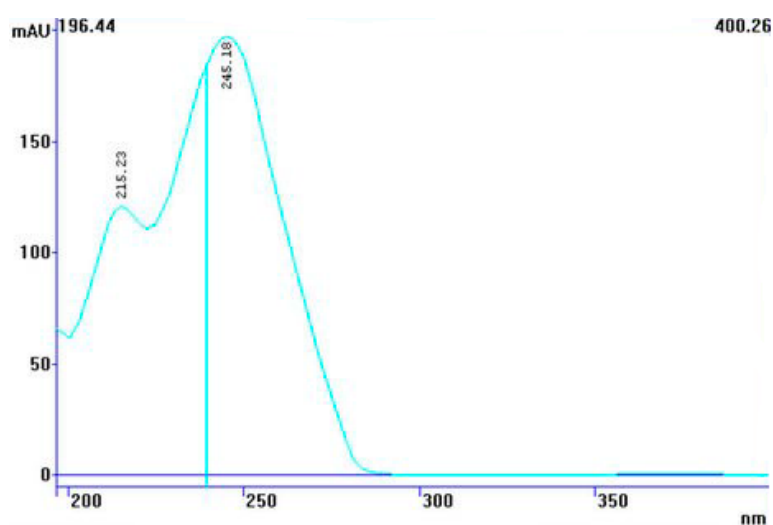

Figure S1. Absorption spectrum of acetamiprid

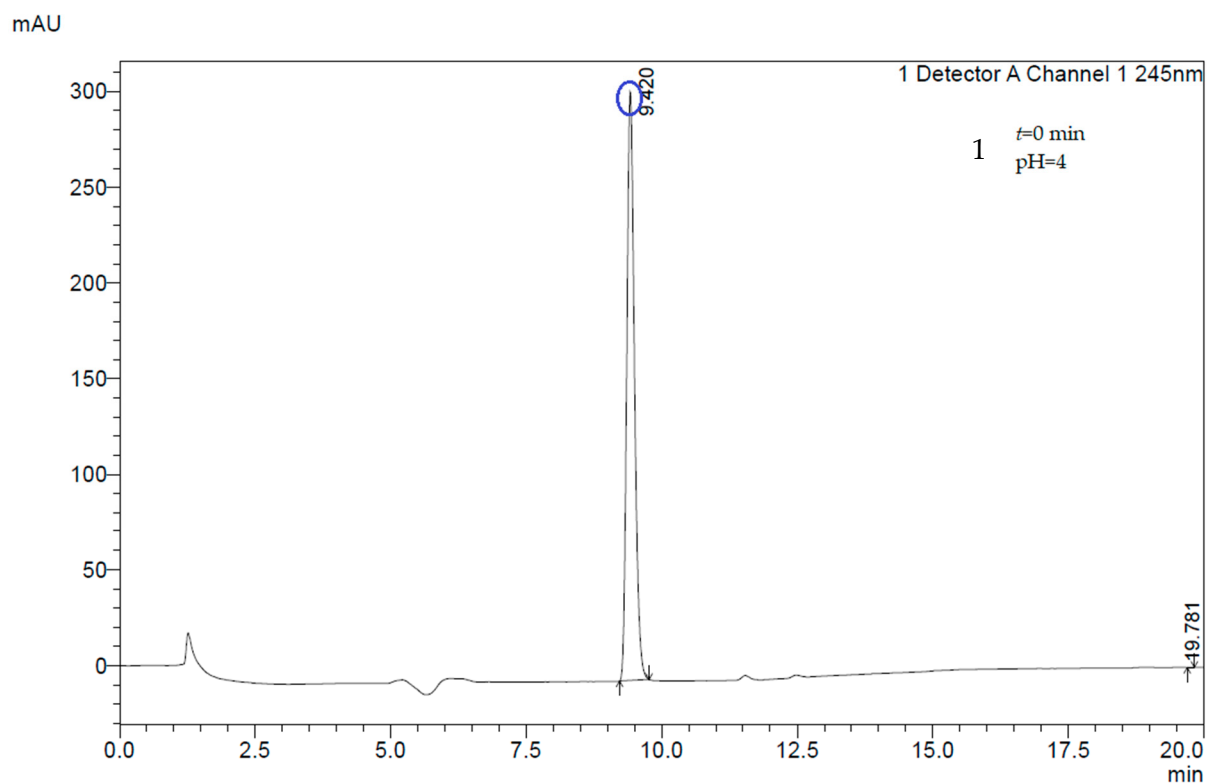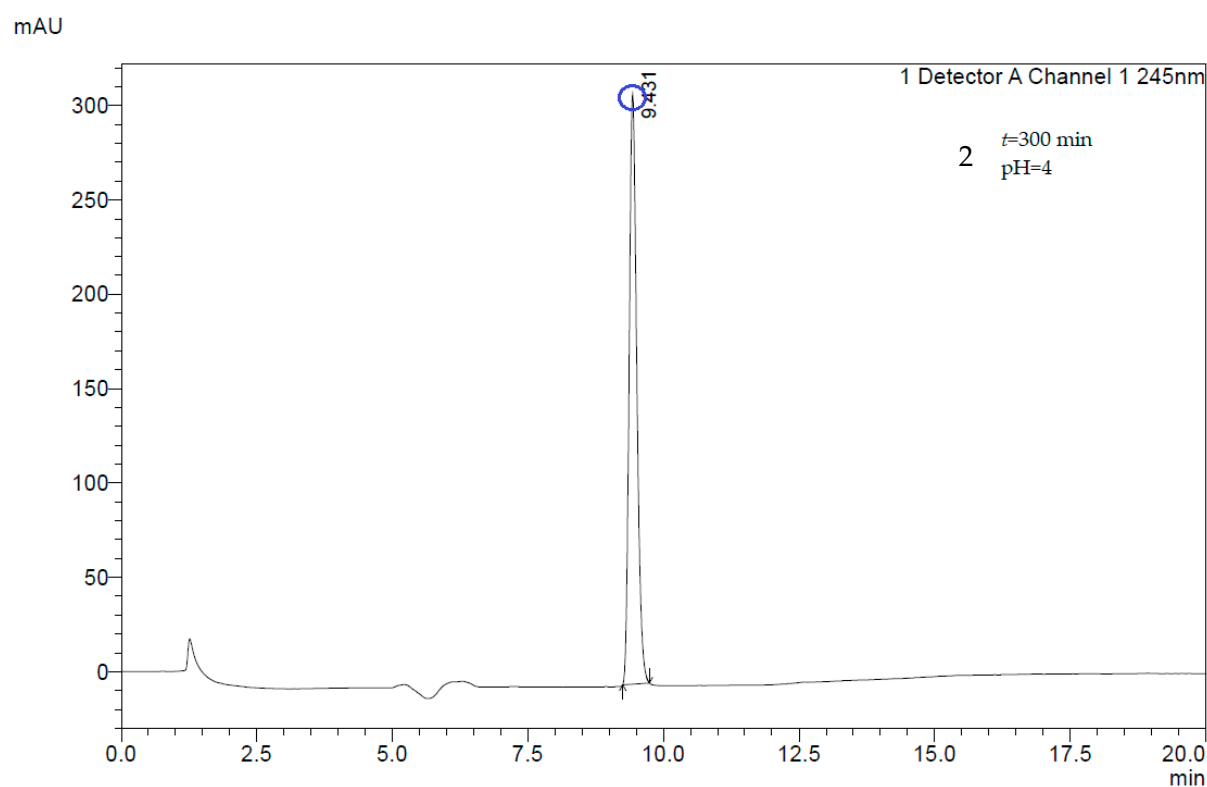

**Figure S2.** Chromatogram of [acetamiprid](#) at pH=4 at time  $t=0$  min (1) and  $t=300$  min (2)

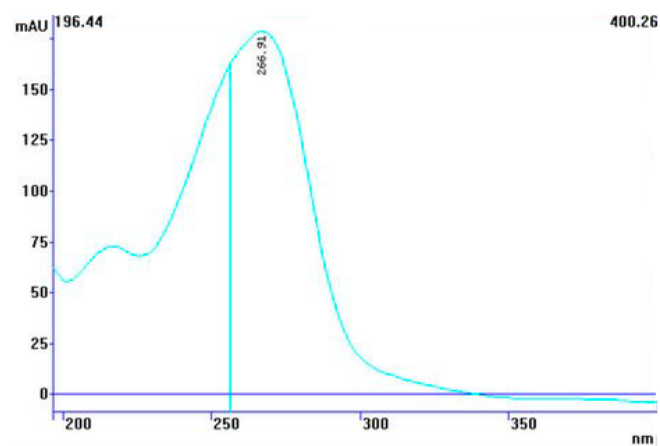

**Figure S3.** Absorption spectrum of clothianidin

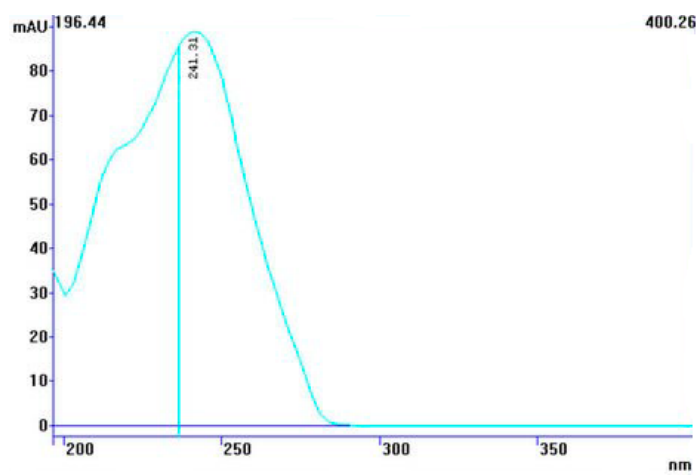

**Figure S4.** Absorption spectrum of thiacloprid

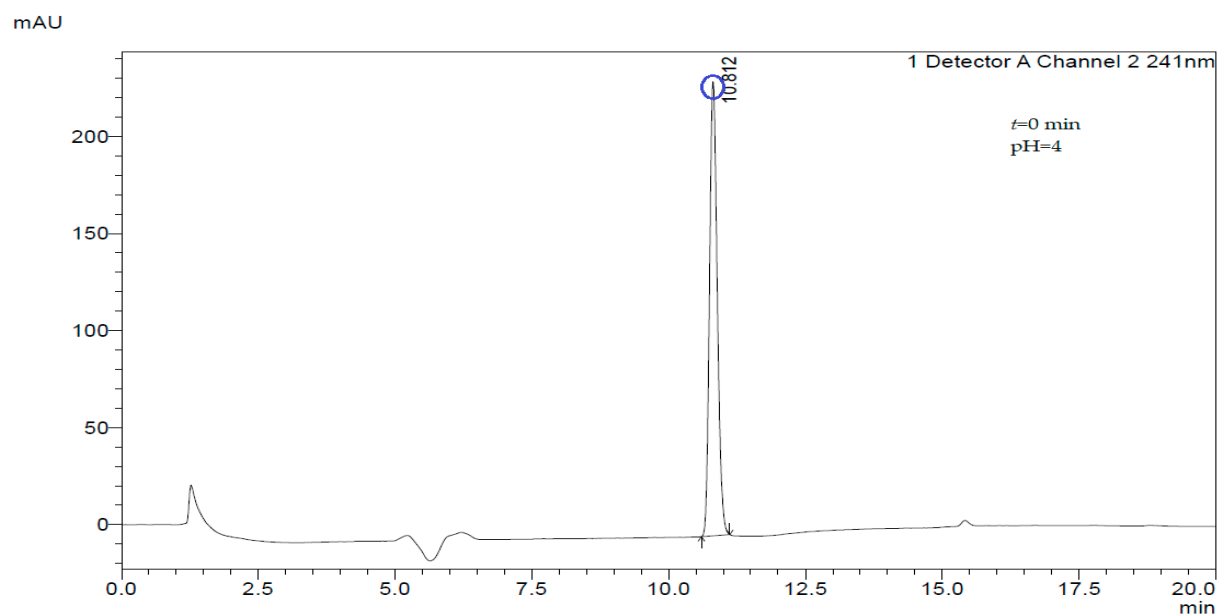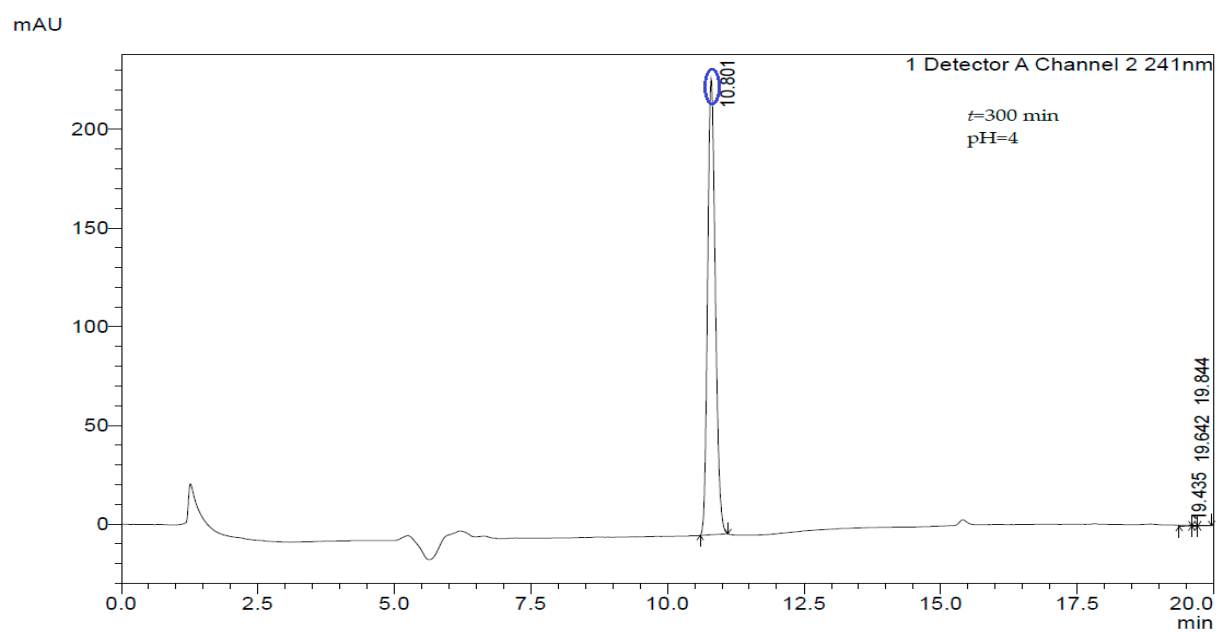

**Figure S5.** Chromatogram of thiocloprid at pH=4 at time  $t=0$  min and  $t=300$  min

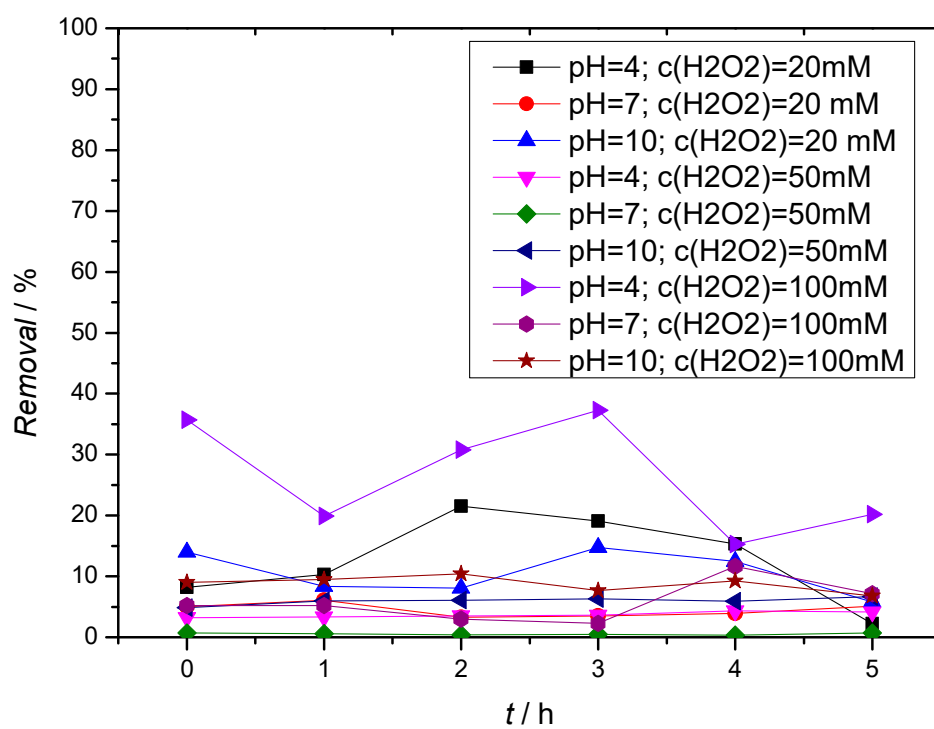

**Figure S6.** Acetamiprid removal after five hours of mixing with  $\text{H}_2\text{O}_2$ ,  $c(\text{H}_2\text{O}_2) = 20$  mM,  $c(\text{H}_2\text{O}_2)=50$  mM and  $c(\text{H}_2\text{O}_2)=100$  mM

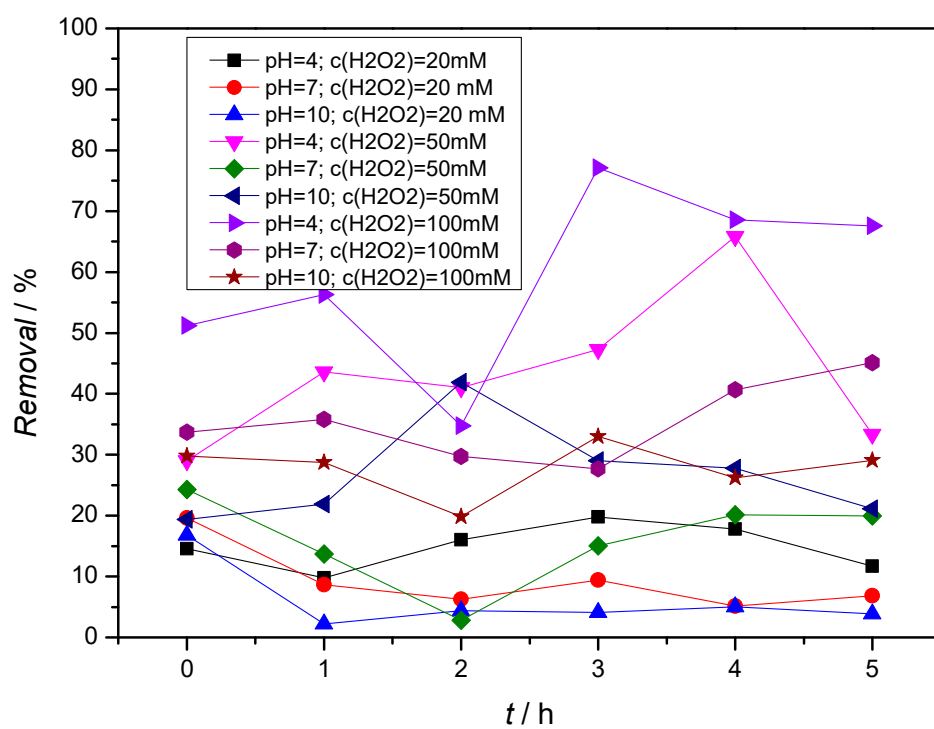

**Figure S7.** Clothianidin removal after five hours of mixing with  $\text{H}_2\text{O}_2$ ,  $c(\text{H}_2\text{O}_2) = 20$  mM,  $c(\text{H}_2\text{O}_2)=50\text{ mM}$  and  $c(\text{H}_2\text{O}_2)=100\text{ mM}$

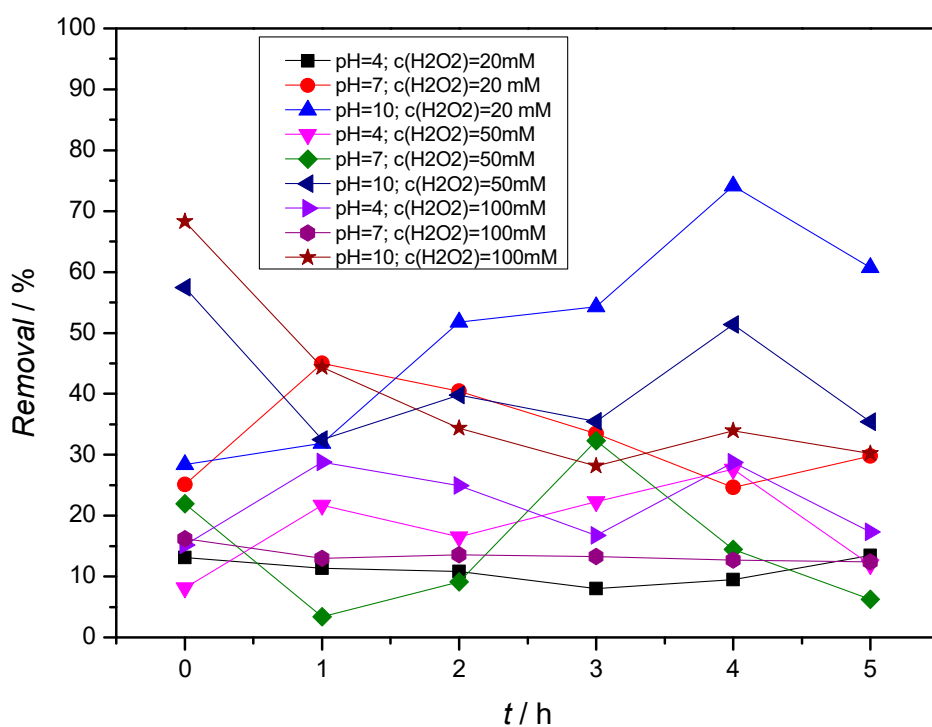

**Figure S8.** Thiocloprid removal after five hours of mixing with H<sub>2</sub>O<sub>2</sub>,  $c(\text{H}_2\text{O}_2) = 20$  mM,  $c(\text{H}_2\text{O}_2) = 50$  mM and  $c(\text{H}_2\text{O}_2) = 100$  mM

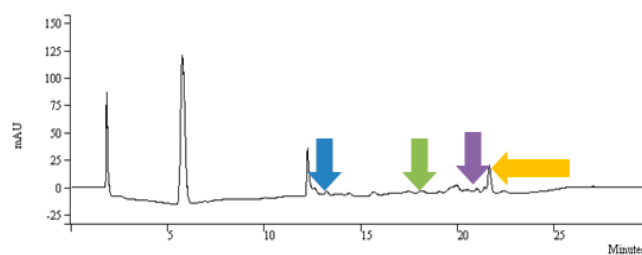

**Figure S9.** Chromatogram of acetamiprid for pH=4 and  $c(\text{H}_2\text{O}_2) = 20$  mM,  $t = 120$  min

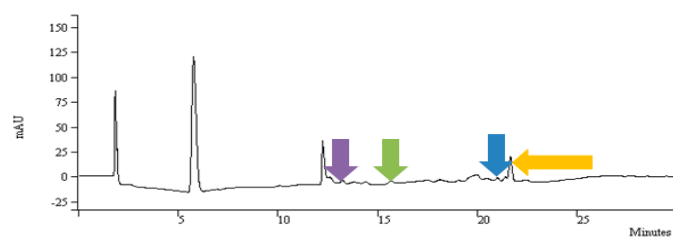

**Figure S10.** Chromatogram of acetamiprid for pH=10 and  $c(\text{H}_2\text{O}_2)=20$  mM,  $t=120$  min

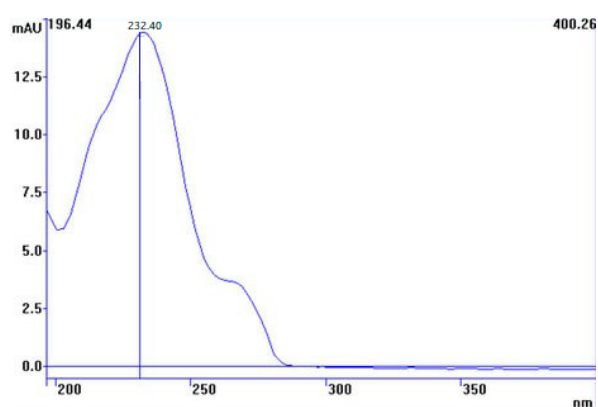

**Figure S11.** Absorption spectrum of the degradation or transformation product of acetamiprid  $t_R=20.963$  min

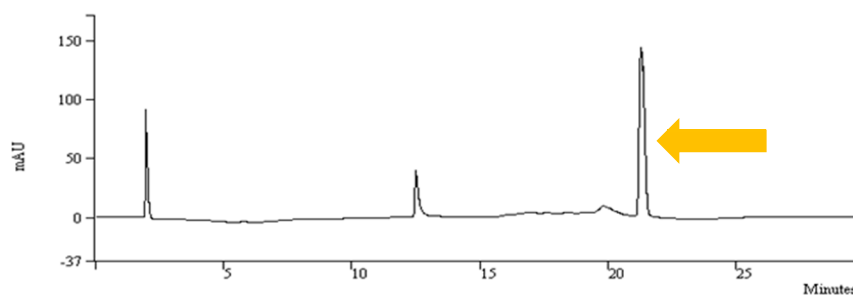

**Figure S12.** Chromatogram of clothianidin for pH=4 and  $c(\text{H}_2\text{O}_2)=20$  mM,  $t=0$  min

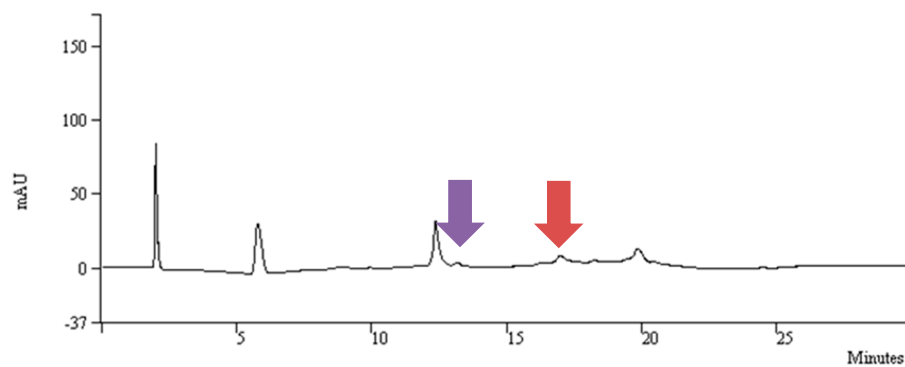

**Figure S13.** Chromatogram of clothianidin for pH=4 and  $c(\text{H}_2\text{O}_2)=20\text{ mM}$ ,  $t=160\text{ min}$

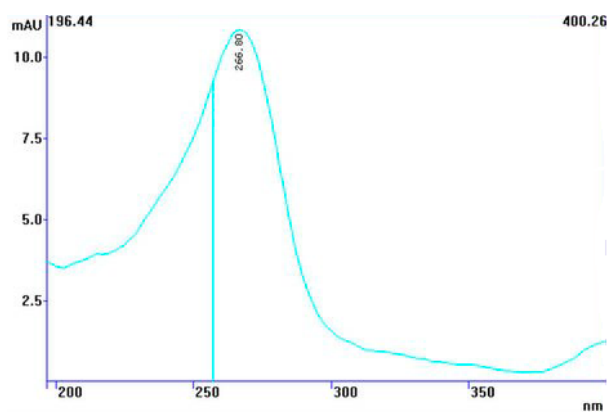

**Figure S14.** Absorption spectrum of the degradation or transformation product of clothianidin  $t_R=16.787\text{ min}$

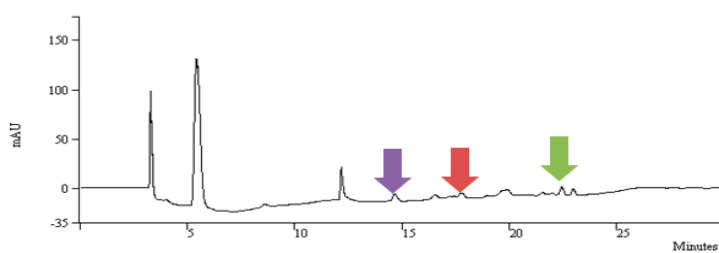

**Figure S15.** Chromatogram of thiacloprid for pH=4 and  $c(\text{H}_2\text{O}_2) = 20\text{ mM}$ ,  $t=120\text{ min}$

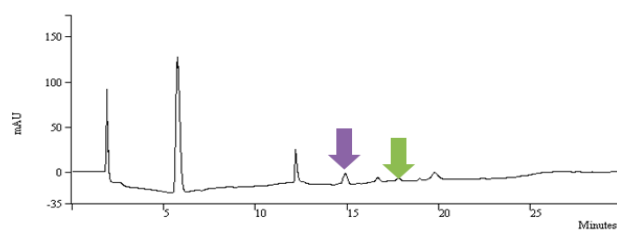

**Figure S16.** Chromatogram of thiocloprid for pH=4 and  $c(\text{H}_2\text{O}_2) = 20 \text{ mM}$ ,  $t=300 \text{ min}$
